# Supplementary material for: Aqueous two phase extraction process of tryptophan based on functionalized ionic liquids
Source: Royal Society of Chemistry journal article supplement (doi:10.1039/c3ra23061a), 2013-01-01

## Supporting information Figure Captions:

- S.Fig.1**  $^1\text{H}$  NMR spectrum of [EAmim]BF<sub>4</sub>  
**S.Fig.2**  $^1\text{H}$  NMR spectrum of [MDCmim]Cl  
**S.Fig.3**  $^1\text{H}$  NMR spectrum of [MDCmim]BF<sub>4</sub>  
**S.Fig.4**  $^1\text{H}$  NMR spectrum of [BMDCim]Cl  
**S.Fig.5**  $^{13}\text{C}$  NMR spectrum of [BMDCim]Cl

S.Fig.1

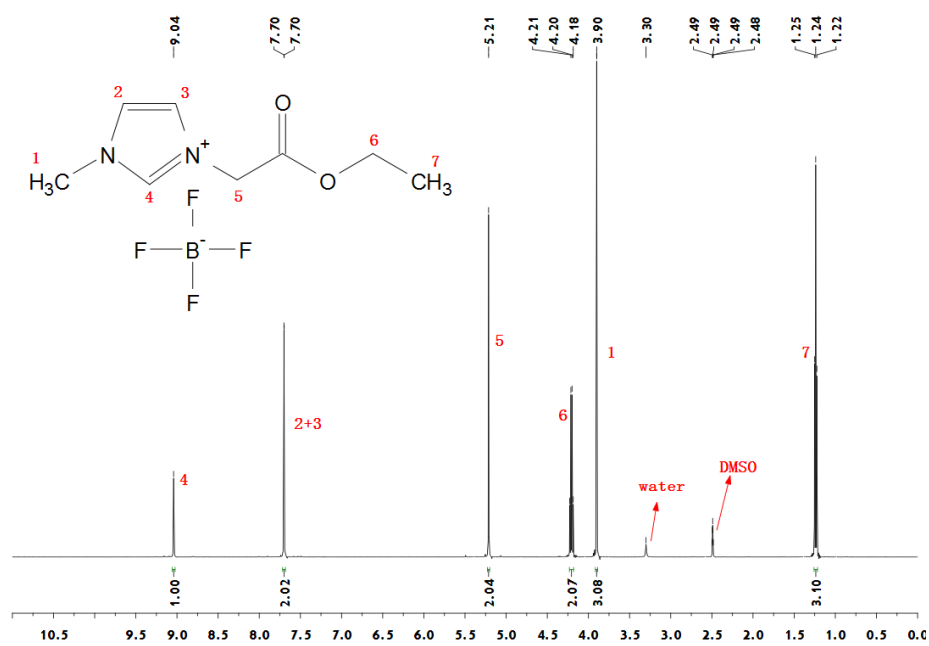

S.Fig.2

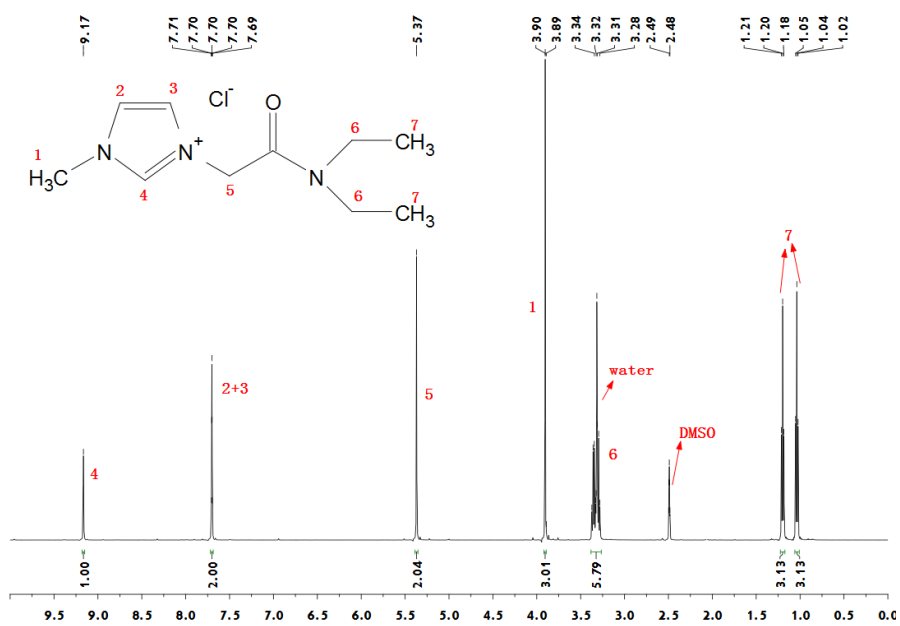

S.Fig.3

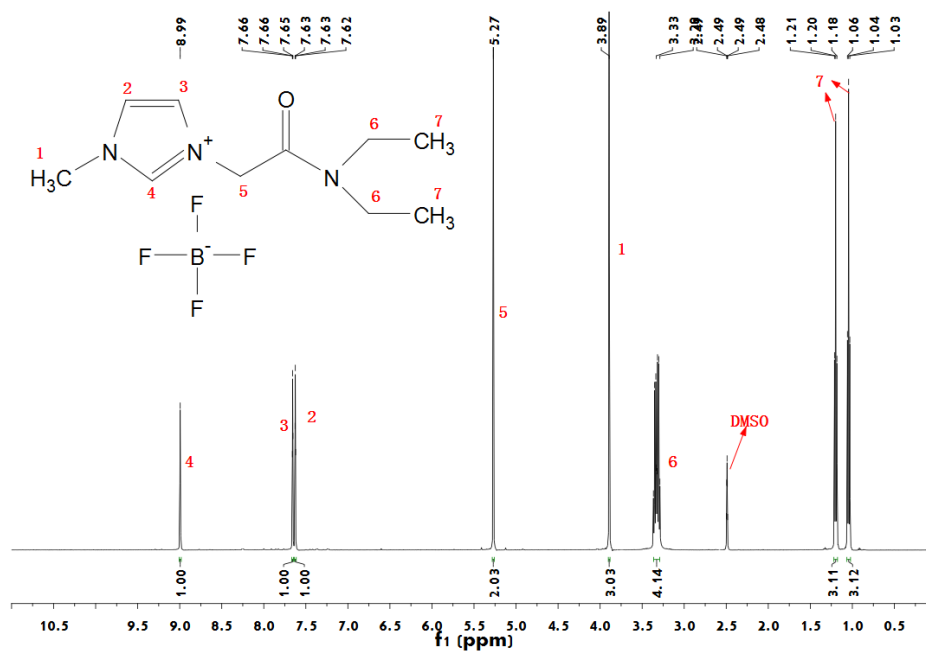

S.Fig.4

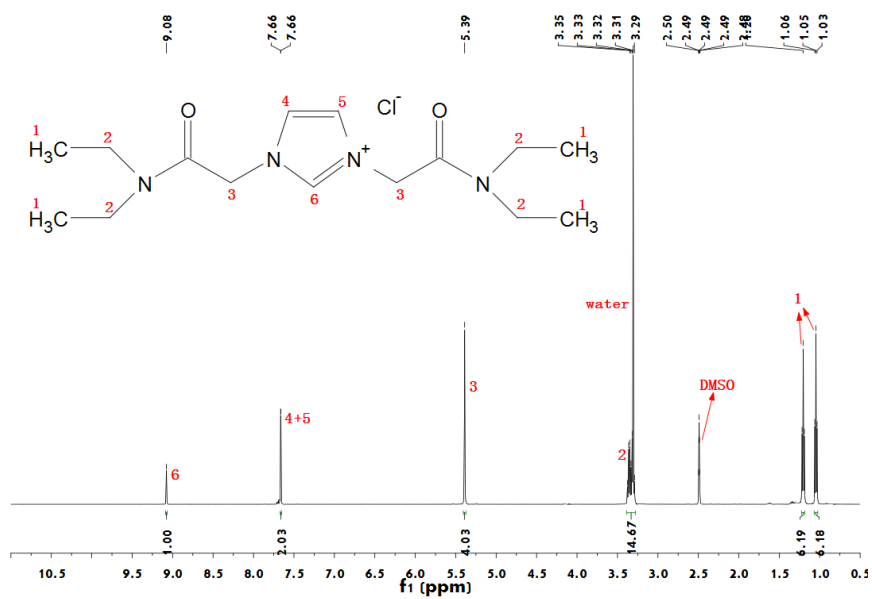

S.Fig.5

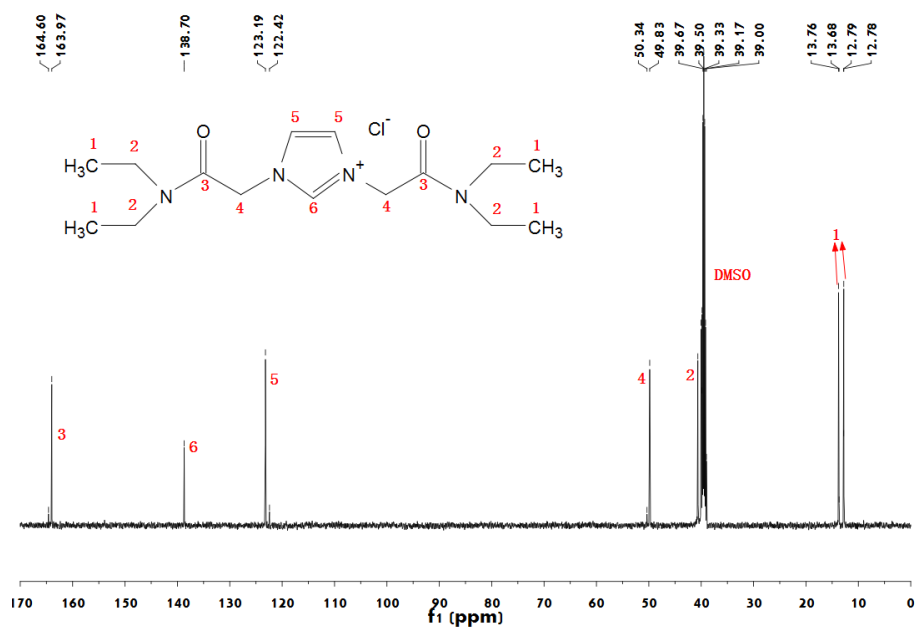

Supplement: c3ra23061a.pdf [file c3ra23061a.pdf]
